# Supplementary material for: Linking deeply-sourced volatile emissions to plateau growth dynamics in southeastern Tibetan Plateau
Source: Nat Commun. 2021 Jul 6;12:4157. doi: 10.1038/s41467-021-24415-y (PMC8260613; doi:10.1038/s41467-021-24415-y)
Supplement: Supplementary file 5 — Supplementary Data 2 [file 41467_2021_24415_MOESM5_ESM.xlsx]

## Sheet: Sheet1
Supplementary Data 2. He-C isotope data of fluids from the SETP and adjacent region (literature).
Sample location	Latitude (N)	Longitude (E)	Distance to the IACB in Myanmar (km)1	Distance to the IACB near the EHS (km)1	3He/4He (RM/RA)2	X3	3He/4He (RC/RA)4	δ13C (CO2) (‰)VPDB	CO2/3He	Data source
Tengchong volcanoes (TCV)
Laogunguo	24°57′21.5″	098°26′17.6″	662		3.2	114	3.22	-3	4.31206e+09	Zhang et al. (2016)
Laogunguo	24°57′21.5″	098°26′17.6″	662		3.5	331	3.51	-3.7	3.9408e+09	Zhang et al. (2016)
Laogunguo	24°57′21.5″	098°26′17.6″	662		4.24	–	–	-3.5	–	Shangguan et al. (2000)
Laogunguo	24°57′21.5″	098°26′17.6″	662		3.9	–	–	–	–	Du et al. (2005)
Xiaogunguo	24°57′21.5″	098°26′17.6″	662		3.9	34.6	3.99	-2.9	2.61168e+09	Wang et al. (1994)
Xiaogunguo	24°57′21.5″	098°26′17.6″	662		4.01	–	–	–	–	Shangguan et al. (2004)
Xiaogunguo	24°57′21.5″	098°26′17.6″	662		3.37	–	–	–	–	Dai et al. (2005)
Dagunguo	24°57′12.5″	098°26′17.5″	662		4.17	80.6	4.21	-4.4	2.14112e+09	Xu et al. (2004)
Dagunguo	24°57′12.5″	098°26′17.5″	662		4.06	161	4.08	-3	1.86774e+09	Xu et al. (2004)
Dagunguo	24°57′12.5″	098°26′17.5″	662		4.84	1536	4.85	-4.4	1.42802e+09	Zhao (2008)
Dagunguo	24°57′12.5″	098°26′17.5″	662		4.44	1367	4.44	–	2.6793e+08	Zhao (2008)
Dagunguo	24°57′12.5″	098°26′17.5″	662		4.31	465	4.32	-2.7	1.49512e+09	Zhao (2008)
Dagunguo	24°57′12.5″	098°26′17.5″	662		3.66	372	3.67	-5.1	3.07159e+09	Xiao et al. (2017)
Dagunguo	24°57′12.5″	098°26′17.5″	662		3.15	472	3.16	-5.2	3.61772e+09	Xiao et al. (2017)
Dagunguo	24°57′12.5″	098°26′17.5″	662		3.86	23	3.99	-3	1.61073e+09	Wang et al. (1994)
Dagunguo	24°57′12.5″	098°26′17.5″	662		4.19	–	–	-2.9	–	Shangguan et al. (2000)
Dagunguo	24°57′12.5″	098°26′17.5″	662		3.26	–	–	-2	–	Dai et al. (2008)
Dagunguo	24°57′12.5″	098°26′17.5″	662		4.19	–	–	–	–	Shangguan (1999)
Dagunguo	24°57′12.5″	098°26′17.5″	662					-5.7	–	Shen et al. (2007)
Quhuangdong	24°57′13.6″	098°26′17.8″	662		3.76	84.1	3.79	-3.9	2.99294e+09	Cheng et al. (2014)
Quhuangdong	24°57′13.6″	098°26′17.8″	662		3.48	108	3.51	-3.7	3.07419e+09	Cheng et al. (2014)
Quhuangdong	24°57′13.6″	098°26′17.8″	662		3.58	18.4	3.76	-2.8	7.31292e+08	Wang et al. (1994)
Quhuangdong	24°57′13.6″	098°26′17.8″	662		–	–	–	-3.4	–	Zhao (2008)
Huaitaijing	24°57′04.3″	098°26′11.0″	662		3.69	7.68	4.09	-4.5	4.70728e+10	Xu et al. (2004)
Huaitaijing	24°57′04.3″	098°26′11.0″	662		2.84	7.79	3.13	-3.8	4.83191e+10	Zhang et al. (2016)
Huaitaijing	24°57′04.3″	098°26′11.0″	662		2.96	–	–	-3.9	–	Shangguan et al. (2000)
Huaitaijing	24°57′04.3″	098°26′11.0″	662		3.8	–	–	-3.2	–	Dai et al. (2005)
Huaitaijing	24°57′04.3″	098°26′11.0″	662		2.94	–	–	-4.3	–	Shangguan et al. (2005)
Huaitaijing	24°57′04.3″	098°26′11.0″	662		–	–	–	-4.9	–	Wang et al. (1994)
Huaitaijing	24°57′04.3″	098°26′11.0″	662		–	–	–	-3.5	–	Wang et al. (1994)
Huaitaijing	24°57′04.3″	098°26′11.0″	662		–	–	–	-6.3	–	Zhao (2008)
Huaitaijing	24°57′04.3″	098°26′11.0″	662		3.92	12.7	4.22	-6.7	–	Xiao et al. (2017)
Huaitaijing	24°57′04.3″	098°26′11.0″	662		–	–	–	-6.5	–	Xiao et al. (2017)
Huaitaijing	24°57′04.3″	098°26′11.0″	662		–	–	–	-3.5	–	Xiao et al. (2017)
Yanjingquan	24°57′03.9″	098°26′09.9″	662		3.66	–	–	-4.3	–	Shangguan et al. (2000)
Yanjingquan	24°57′03.9″	098°26′09.9″	662		3.37	7.95	3.79	-5	–	Xiao et al. (2017)
Yanjingquan	24°57′03.9″	098°26′09.9″	662		–	–	–	-4.8	–	Xiao et al. (2017)
Zhenzhuquan	24°57′04.0″	098°26′09.7″	662		2.72	5.57	3.18	-4.9	6.52156e+10	Zhang et al. (2016)
Zhenzhuquan	24°57′04.0″	098°26′09.7″	662		3.77	–	–	-5.3	–	Shangguan et al. (2000)
Zhenzhuquan	24°57′04.0″	098°26′09.7″	662		3.34	–	–	-3.3	–	Dai et al. (1994)
Zhenzhuquan	24°57′04.0″	098°26′09.7″	662		–	–	–	-5	–	Wang et al. (1994)
Zhenzhuquan	24°57′04.0″	098°26′09.7″	662		–	–	–	-5	–	Xiao et al. (2017)
Zhenzhuquan	24°57′04.0″	098°26′09.7″	662		–	–	–	-5.9	–	Xiao et al. (2017)
Gumingquan	24°57′04.0″	098°26′10.3″	662		2.8	–	–	-4.8	–	Shangguan et al. (2000)
Meinvchi	24°57′04.0″	098°26′10.3″	662		–	–	–	-6.1	–	Zhao (2008)
Meinvchi	24°57′04.0″	098°26′10.3″	662		–	–	–	-3.7	–	Xiao et al. (2017)
Meinvchi	24°57′04.0″	098°26′10.3″	662		–	–	–	-3.5	–	Xiao et al. (2017)
Shizitou	24°57′00.0″	098°26′16.8″	662		–	–	–	-2.1	–	Zhang et al. (2016)
Shizitou	24°57′00.0″	098°26′16.8″	662		–	–	–	-3	–	Zhang et al. (2016)
Shizitou	24°57′00.0″	098°26′16.8″	662		3.36	33.4	3.43	-4.7	1.33131e+10	Cheng et al. (2014)
Shizitou	24°57′00.0″	098°26′16.8″	662		4.04	17.3	4.23	-4.8	8.25123e+09	Cheng et al. (2014)
Shizitou	24°57′00.0″	098°26′16.8″	662		3.36	–	–	-4.3	–	Shangguan et al. (2000)
Shizitou	24°57′00.0″	098°26′16.8″	662		2.39	–	–	-4.6	–	Shangguan et al. (2000)
Hamazui	24°56′59.9″	098°26′17.1″	662		3.2	25.3	3.31	-5.6	–	Xiao et al. (2017)
Hamazui	24°56′59.9″	098°26′17.1″	662		3.71	19.5	3.86	-6.3	–	Xiao et al. (2017)
Hamazui	24°56′59.9″	098°26′17.1″	662		3.86	24.2	4.01	-5.1	–	Xiao et al. (2017)
Hamazui	24°56′59.9″	098°26′17.1″	662		2.69	8.19	2.93	-5	–	Xiao et al. (2017)
Hamazui	24°56′59.9″	098°26′17.1″	662		3.34	7.44	3.78	-5	–	Xiao et al. (2017)
Hamazui	24°56′59.9″	098°26′17.1″	662		–	–	–	-4.5	–	Xiao et al. (2017)
Kekaochi	24°56′59.9″	098°26′17.1″	662		–	–	–	-5.4	–	Xiao et al. (2017)
Kekaochi	24°56′59.9″	098°26′17.1″	662		–	–	–	-5.6	–	Xiao et al. (2017)
Xipo	24°56′59.9″	098°26′17.1″	662		–	–	–	-4.5	–	Zhao (2008)
Xipo	24°56′59.9″	098°26′17.1″	662		–	–	–	-7.6	–	Zhao (2008)
Dongpo	24°56′59.9″	098°26′17.1″	662		–	–	–	-4.4	–	Zhao (2008)
Xipo	24°56′59.9″	098°26′17.1″	662		–	–	–	-5.8	–	Shangguan et al. (2000)
Xipo	24°56′59.9″	098°26′17.1″	662		–	–	–	-4.7	–	Shangguan et al. (2000)
Zhongjing	24°56′59.9″	098°26′17.1″	662		–	–	–	-5	–	Shangguan et al. (2000)
Nananjing	24°56′59.9″	098°26′17.1″	662		–	–	–	-5.8	–	Shangguan et al. (2000)
Poding	24°56′58.9″	098°26′15.7″	662		4.21	380	4.22	-4	4.48409e+09	Shangguan et al. (2005)
Poding	24°56′58.9″	098°26′15.7″	662		3.89	13.1	4.13	–	2.36516e+10	Shangguan et al. (2005)
Poding	24°56′58.9″	098°26′15.7″	662		3.64	17.3	3.8	–	2.82965e+10	Shangguan et al. (2005)
Poding	24°56′58.9″	098°26′15.7″	662		4.49	223	4.51	-4.1	3.12906e+09	Shangguan et al. (2005)
Zaotanghe	24°57′00.0″	098°26′16.4″	662		1.49	12.7	1.54	–	1.17688e+11	Shangguan et al. (2005)
Zaotanghe	24°57′00.0″	098°26′16.4″	662		4.01	299	4.02	–	8.57761e+09	Shangguan et al. (2005)
Zaotanghe	24°57′00.0″	098°26′16.4″	662		2.86	–	–	-1.9	–	Dai et al. (1994)
Zaotanghe	24°57′00.0″	098°26′16.4″	662		2.86	–	–	-3.5	–	Dai et al. (1994)
Zaotanghe	24°57′00.0″	098°26′16.4″	662		–	–	–	-6.3	–	Dai et al. (1994)
Zaotanghe	24°57′00.0″	098°26′16.4″	662		–	–	–	-2.3	–	Dai et al. (1994)
Zaotanghe	24°57′00.0″	098°26′16.4″	662		–	–	–	-3.8	–	Xu et al. (2004)
Zaotanghe	24°57′00.0″	098°26′16.4″	662		2.39	177	2.4	-6.6	2.62355e+10	Zhao (2008)
Zaotanghe	24°57′00.0″	098°26′16.4″	662		–	–	–	-3.1	–	Zhao (2008)
Zaotanghe	24°57′00.0″	098°26′16.4″	662		–	–	–	-4.9	–	Zhao (2008)
Zaotanghe	24°57′00.0″	098°26′16.4″	662		–	–	–	-5.4	–	Zhao (2008)
Jiaotong Hotel	24°57′00.0″	098°26′20.4″	662		4.38	142	4.41	–	1.85746e+09	Zhao (2008)
Jiaotong Hotel	24°57′00.0″	098°26′20.4″	662		4.39	322	4.4	–	8.77861e+09	Zhao (2008)
Jiaotong Hotel	24°57′00.0″	098°26′20.4″	662		–	–	–	-3.9	–	Zhao (2008)
Huangguaqing	24°56′27.9″	098°26′21.2″	662		4.21	–	–	-3.2	–	Shangguan et al. (2000)
Huangguaqing	24°56′27.9″	098°26′21.2″	662		4.37	–	–	-3.6	–	Shangguan et al. (2000)
Huangguaqing	24°56′27.9″	098°26′21.2″	662		4.44	–	–	-2.3	–	Dai et al. (2005)
Huangguaqing	24°56′27.9″	098°26′21.2″	662		4.11	741	4.11	-2.7	1.69576e+09	Wang et al. (1994)
Huangguaqing	24°56′27.9″	098°26′21.2″	662		4.21	791	4.21	-3.7	2.13494e+09	Wang et al. (1994)
Huangguaqing	24°56′27.9″	098°26′21.2″	662		4.02	65.3	4.07	-3	2.0833e+09	Wang et al. (1994)
Huangguaqing	24°56′27.9″	098°26′21.2″	662		–	–	–	-2.9	–	Wang et al. (1994)
Huangguaqing	24°56′27.9″	098°26′21.2″	662		4.1	319	4.11	-4.1	3.10923e+09	Xu et al. (2004)
Huangguaqing	24°56′27.9″	098°26′21.2″	662		4.21	622	4.22	-3	1.07725e+09	Zhao (2008)
Huangguaqing	24°56′27.9″	098°26′21.2″	662		–	–	–	-3.7	–	Zhao (2008)
Dadijiao	24°56′56.0″	098°26′40.6″	662		4.09	–	–	-3.7	–	Shangguan et al. (2004)
Dadijiao	24°56′56.0″	098°26′40.6″	662		4.11	1113	4.11	-3.9	3.58863e+09	Xu et al. (2004)
Dadijiao	24°56′56.0″	098°26′40.6″	662		4.19	–	–	-2.6	–	Shangguan et al. (2000)
Dadijiao	24°56′56.0″	098°26′40.6″	662		–	–	–	-5.5	–	Shangguan et al. (2000)
Dieshuihe	25°01′52.7″	098°25′56.4″	669		4.81	–	–	-4.7	–	Shangguan et al. (2000)
Dieshuihe	25°01′52.7″	098°25′56.4″	669		4.49	–	–	-1.3	–	Dai et al. (2008)
Dieshuihe	25°01′52.7″	098°25′56.4″	669		4.92	115	4.96	-6.7	2.58028e+08	Wang et al. (1994)
Dieshuihe	25°01′52.7″	098°25′56.4″	669		3.2	76.8	3.23	-5.2	–	Wang et al. (1994)
Dieshuihe	25°01′52.7″	098°25′56.4″	669		5.05	768	5.06	-7.1	2.19956e+09	Xu et al. (2004)
Dieshuihe	25°01′52.7″	098°25′56.4″	669		5.69	787	5.7	–	1.37469e+08	Zhao (2008)
Dieshuihe	25°01′52.7″	098°25′56.4″	669		5.54	1060	5.55	-6.7	8.60288e+08	Zhao (2008)
Dieshuihe	25°01′52.7″	098°25′56.4″	669		5.91	518	5.92	-6.4	2.79538e+08	Zhao (2008)
Dieshuihe	25°01′52.7″	098°25′56.4″	669		4.34	568	4.34	-6	3.71869e+08	Zhang et al. (2016)
Dieshuihe	25°01′52.7″	098°25′56.4″	669		4.3	623	4.31	-5.6	4.62237e+08	Zhang et al. (2016)
Dieshuihe	25°01′52.7″	098°25′56.4″	669		5.23	110	5.27	-9	–	Zhang et al. (2016)
Heshun	25°00′50.4″	098°27′54.0″	667		–	–	–	-5.8	–	Dai et al. (1994)
Heshun	25°00′50.4″	098°27′54.0″	667		5.16	960	5.16	-6.6	1.74384e+09	Xu et al. (2004)
Heshun	25°00′50.4″	098°27′54.0″	667		5.81	257	5.83	-8.5	–	Zhao (2008)
Heshun	25°00′50.4″	098°27′54.0″	667		5.66	203	5.69	–	–	Zhao (2008)
Heshun	25°00′50.4″	098°27′54.0″	667		5.58	276	5.6	–	–	Zhao (2008)
Heshun	25°00′50.4″	098°27′54.0″	667		5.39	–	–	-3.8	–	Shangguan et al. (2000)
Heshun	25°00′50.4″	098°27′54.0″	667		5.13	92.1	5.18	-6.2	1.229e+09	Wang et al. (1994)
Yinjiawan	25°03′03.6″	098°31′58.8″	675		5.46	188	5.49	–	–	Zhao (2008)
Yinjiawan	25°03′03.6″	098°31′58.8″	675		5.21	188	5.23	–	–	Zhao (2008)
Yuanjiatang	25°01′40.8″	098°31′08.4″	673		5.64	192	5.67	–	–	Zhao (2008)
Shaba	24°58′01.2″	098°31′37.2″	671		1.89	13.8	1.96	–	–	Zhao (2008)
Shaba	24°58′01.2″	098°31′37.2″	671		1.73	13.1	1.79	-29.8	3.32319e+07	Xu et al. (2004)
Yongle	24°57′25.2″	098°32′06.0″	672		1.18	17.7	1.19	–	1.96051e+07	Zhao (2008)
Yongle	24°57′25.2″	098°32′06.0″	672		1.19	20	1.2	–	1.59116e+08	Zhao (2008)
Daju	25°04′33.6″	098°34′30.0″	680		1.74	41.5	1.75	–	–	Zhao (2008)
Hehua	24°54′32.4″	098°23′24.0″	656		3.04	61.4	3.07	-3.7	1.23087e+11	Xu et al. (2004)
Hehua	24°54′32.4″	098°23′24.0″	656		2.59	9.21	2.78	-3.8	3.76425e+10	Zhao (2008)
Hehua	24°54′32.4″	098°23′24.0″	656		–	–	–	-4.5	–	Zhao (2008)
Hehua	24°54′32.4″	098°23′24.0″	656		3	–	–	–	–	Shangguan (1999)
Hehua	24°54′32.4″	098°23′24.0″	656		3.28	192	3.29	-2.7	2.24517e+09	Wang et al. (1994)
Hehua	24°54′32.4″	098°23′24.0″	656		2.73	8.02	2.98	-5.5	–	Zhang et al. (2016)
Hehua	24°54′32.4″	098°23′24.0″	656		2.7	7.85	3	-5.1	–	Xiao et al. (2017)
Hehua	24°54′32.4″	098°23′24.0″	656		2.85	11.2	3.06	-5.1	–	Xiao et al. (2017)
Hehua	24°54′32.4″	098°23′24.0″	656		2.71	7.82	3.02	-6	–	Xiao et al. (2017)
Hehua	24°54′32.4″	098°23′24.0″	656		2.74	8.92	3	-5.1	–	Xiao et al. (2017)
Yongan	25°18′50.4″	098°37′26.4″	693		4.76	12.3	5.15	–	1.72685e+10	Zhao (2008)
Yongan	25°18′50.4″	098°37′26.4″	693		–	–	–	-4.1	–	Zhao (2008)
Chequetang	25°13′55.2″	098°37′51.6″	691		2.83	–	–	-2.4	–	Shangguan et al. (2000)
Xiaotangba	25°12′43.2″	098°35′42.0″	686		3.27	–	–	-4	–	Shangguan et al. (2000)
Xiaotangba	25°12′43.2″	098°35′42.0″	686		–	–	–	-5.7	–	Xu et al. (2004)
Dongde	25°22′19.2″	098°52′19.2″	719		1.18	16.1	1.19	–	–	Zhao (2008)
Baihualing	25°17′12.4″	098°48′02.6″	709		0.95	150	0.95	–	7.61255e+08	Zhao (2008)
Baihualing	25°17′12.4″	098°48′02.6″	709		0.91	26.9	0.9	–	3.99907e+09	Zhao (2008)
Xiaoxinzhai	25°12′43.2″	098°50′16.8″	710		0.93	7.68	0.92	–	–	Zhao (2008)
Hengshan	25°06′10.8″	098°56′09.6″	715		0.26	104	0.25	–	–	Zhao (2008)
Houziya	25°05′52.8″	098°50′16.8″	705		0.7	88.3	0.69	–	4.19371e+08	Zhao (2008)
Piaopu	25°01′30.0″	099°00′28.8″	720		0.22	353	0.22	–	4.6287e+08	Zhao (2008)
Xincheng	24°52′37.2″	098°52′08.4″	702		0.36	38.4	0.34	–	5.01683e+08	Zhao (2008)
Datang Shaba	25°40′08.4″	098°40′40.8″	713		0.38	42.2	0.37	–	–	Zhao (2008)
Datang Zhongzhai	25°37′44.4″	098°40′04.8″	710		0.37	157	0.37	–	2.62523e+08	Zhao (2008)
Dongjiazhai	25°22′26.4″	098°41′49.2″	702		0.88	88.3	0.88	–	2.14404e+06	Zhao (2008)
Shiqiang	25°21′50.4″	098°38′02.4″	696		–	–	–	-3.3	–	Wang et al. (1994)
Shiqiang	25°21′50.4″	098°38′02.4″	696		0.45	177	0.45	-2.9	2.08541e+10	Xu et al. (2004)
Shiqiang	25°21′50.4″	098°38′02.4″	696		–	–	–	-4.2	–	Xu et al. (2004)
Shiqiang	25°21′50.4″	098°38′02.4″	696		0.72	–	–	–	–	Shangguan (1999)
Xinzhai Xiaotang	25°01′48.0″	098°40′12.0″	687		2.62	1033	2.62	–	360197	Zhao (2008)
Cuanlong	25°01′37.2″	098°43′30.0″	692		0.29	30.7	0.26	–	–	Zhao (2008)
Banshan Zaotang	24°57′28.8″	098°36′50.4″	679		0.8	5.37	0.75	–	–	Zhao (2008)
Menglian	24°53′45.6″	098°35′27.6″	675		1.31	8.83	1.35	-17	1.61589e+07	Xu et al. (2004)
Menglian	24°53′45.6″	098°35′27.6″	675		1.46	10.8	1.51	-7.2	–	Zhao (2008)
Liujiazhai	24°50′24.0″	098°31′37.2″	667		0.74	24.5	0.72	–	–	Zhao (2008)
Wuhe Gejiazhai	24°52′44.4″	098°39′25.2″	681		1.93	568	1.93	-3.8	1.67872e+08	Zhao (2008)
Wuhe Gejiazhai	24°52′44.4″	098°39′25.2″	681		1.84	–	–	-0.5	–	Shangguan et al. (2000)
Dianding	24°49′30.0″	098°43′30.0″	686		0.97	142	0.97	–	9.60169e+07	Zhao (2008)
Huangcaoshan	24°49′33.6″	098°43′55.2″	686		0.99	154	0.99	–	1.09094e+08	Zhao (2008)
Yangxi	24°46′08.4″	098°39′10.8″	677		2.1	683	2.1	-4.5	3.41086e+07	Zhao (2008)
Yangxi	24°46′08.4″	098°39′10.8″	677		2.14	618	2.14	–	1.48517e+07	Zhao (2008)
Hubeng	24°43′48.0″	098°35′16.8″	670		2.33	28	2.38	–	–	Zhao (2008)
Shangbengnai	24°43′30.6″	098°33′16.0″	666		2.44	20.7	2.52	–	–	Zhao (2008)
Bengbie Zaotang	24°43′01.2″	098°40′37.2″	678		0.98	177	0.98	-2.9	1.88439e+08	Zhao (2008)
Hehua Zaotang	24°42′43.2″	098°40′33.6″	678		0.97	180	0.97	-3.7	1.35891e+08	Zhao (2008)
Banglazhang	24°39′18.3″	098°40′04.1″	676		0.88	46.1	0.88	-1.9	1.08719e+10	Xu et al. (2004)
Banglazhang	24°39′18.3″	098°40′04.1″	676		0.89	161	0.89	-1.1	1.65454e+10	Xu et al. (2004)
Banglazhang	24°39′18.3″	098°40′04.1″	676		0.87	192	0.87	-1.5	4.74422e+09	Xu et al. (2004)
Banglazhang	24°39′18.3″	098°40′04.1″	676		0.9	–	–	-1	–	Shangguan et al. (2000)
Banglazhang	24°39′18.3″	098°40′04.1″	676		0.85	–	–	-0.2	–	Shangguan et al. (2000)
Banglazhang	24°39′18.3″	098°40′04.1″	676		0.89	–	–	-4.9	–	Shen et al. (2007)
Banglazhang	24°39′18.3″	098°40′04.1″	676		0.96	38.4	0.96	-0.7	3.55787e+09	Zhao (2008)
Banglazhang	24°39′18.3″	098°40′04.1″	676		0.96	111	0.96	-1.6	3.07694e+09	Zhao (2008)
Zuanshuihe	24°39′36.0″	098°43′08.4″	681		0.56	92	0.55	-5.1	2.20165e+08	Zhao (2008)
Dafoquan	24°35′16.8″	098°40′15.6″	674		0.9	–	–	–	–	Shangguan (1999)
Panzhihua Xiaotang	24°43′48.0″	098°28′19.2″	659		2.14	9.21	2.27	-2.6	6.59726e+10	Zhao (2008)
Xinhua	24°42′41.3″	098°29′09.2″	659		1.09	–	–	–	–	Shangguan (1999)
Xinhua	24°42′41.3″	098°29′09.2″	659		1.18	–	–	–	–	Shangguan (1999)
Heishihe Zaotang	24°41′49.2″	098°29′02.4″	659		2.24	123	2.25	-3.9	2.89111e+09	Zhao (2008)
Suqing Zaotang	24°40′30.0″	098°27′39.6″	656		1.97	346	1.98	-6.7	1.03463e+08	Zhao (2008)
Diyang	24°35′31.2″	098°18′28.8″	638		0.77	46.1	0.77	–	–	Zhao (2008)
Danzha	25°27′36.0″	098°15′54.0″	665		0.21	76.8	0.2	-4.6	3.54624e+06	Xu et al. (2004)
Ruidian	25°26′20.4″	098°27′28.8″	683		0.46	1727	0.46	-5.4	1.99064e+10	Xu et al. (2004)
Ruidian	25°26′20.4″	098°27′28.8″	683		0.45	2918	0.45	-5.3	3.5169e+09	Xu et al. (2004)
Ruidian	25°26′20.4″	098°27′28.8″	683		–	–	–	-5.6	–	Xu et al. (2004)
Ruidian	25°26′20.4″	098°27′28.8″	683		0.48	97	0.47	-4	1.35092e+10	Wang et al. (1994)
Ruidian	25°26′20.4″	098°27′28.8″	683		0.49	127	0.49	-4	5.72692e+09	Wang et al. (1994)
Ruidian	25°26′20.4″	098°27′28.8″	683		0.47	–	–	–	–	Shangguan (1999)
Ruidian	25°26′20.4″	098°27′28.8″	683		0.48	–	–	–	–	Shangguan (1999)
Houdian	25°24′15.3″	098°23′03.3″	674		0.21	80.6	0.2	–	1.05822e+10	Zhao (2008)
Heinitang	25°21′10.8″	098°08′13.2″	649		0.48	177	0.48	–	3.06658e+10	Zhao (2008)
Sujiang	25°21′00.0″	098°17′02.4″	663		0.45	326	0.45	-3.8	1.2758e+11	Xu et al. (2004)
Xiaodian	25°21′10.8″	098°23′52.8″	673		0.25	84.5	0.24	–	–	Zhao (2008)
Xiaoshuiba	25°18′00.0″	098°17′45.6″	662		0.34	614	0.34	-9.5	4.4369e+08	Xu et al. (2004)
Qingkou	25°14′09.6″	098°18′25.2″	660		0.39	99.8	0.38	-14.6	1.25176e+08	Xu et al. (2004)
Qingkou	25°14′09.6″	098°18′25.2″	660		0.4	–	–	–	–	Shangguan (1999)
Xiaolaisong	25°08′11.7″	098°21′17.3″	661		0.24	61.4	0.22	-14.4	9.04658e+07	Xu et al. (2004)
Xiaolaisong	25°08′11.7″	098°21′17.3″	661		0.26	273	0.25	–	–	Zhao (2008)
Beidong	25°07′01.2″	098°24′32.4″	666		1.97	115	1.98	–	542576	Zhao (2008)
Beidong	25°07′01.2″	098°24′32.4″	666		2.09	131	2.1	–	–	Zhao (2008)
Dacun	25°03′03.6″	098°22′26.4″	659		0.54	76.8	0.53	–	3.04772e+06	Zhao (2008)
Dacun	25°03′03.6″	098°22′26.4″	659		0.71	88.3	0.71	–	–	Zhao (2008)
Mengbeng	24°59′45.6″	098°18′18.0″	651		0.31	104	0.3	–	5.09231e+06	Zhao (2008)
Qimao	24°57′00.0″	098°19′55.2″	652		0.76	123	0.76	-7.7	1.90247e+08	Zhao (2008)
Dapingzi	24°51′39.6″	098°19′37.2″	649		1.91	–	–	–	–	Shangguan (1999)
Longwozhai	24°47′34.8″	098°15′50.4″	640		1.39	104	1.39	-12.9	4.36612e+07	Xu et al. (2004)
Manke	24°44′38.4″	098°06′39.6″	624		0.64	–	–	–	–	Shangguan (1999)
Bangbie	24°38′31.2″	098°12′21.6″	630		0.62	53.7	0.61	–	–	Zhao (2008)
Guoqishan	24°33′00.0″	098°08′31.2″	621		1.39	180	1.4	–	–	Zhao (2008)
Jingxin	25°01′26.4″	098°08′56.4″	637		0.57	57.6	0.56	–	–	Zhao (2008)
Lanniba	24°56′24.0″	098°07′48.0″	632		0.51	92.1	0.5	–	7.76216e+08	Zhao (2008)
Xiaka	24°50′27.6″	098°06′46.8″	627		0.23	36.1	0.21	–	–	Zhao (2008)
Kachang	24°59′56.4″	097°46′51.6″	602		1.52	395	1.52	–	2.37403e+07	Zhao (2008)
Humeng	24°46′26.4″	097°55′19.2″	607		1.24	104	1.24	–	2.99e+08	Zhao (2008)
Simao volcanoes (SMV)
Dashujiao	22°48′07.8″	101°15′06.3″	866		1.04	1127	1.04326	–	–	Bo et al. (2015)
Dashujiao	22°48′07.8″	101°15′06.3″	866		1.63309	107.872	1.63934	-7.2	3.18538e+09	Zhou et al. p.c.5
Xisa	23°12′30.0″	101°00′09.2″	865		0.22	13.82	0.145248	-11.8	2.48438e+09	Zhou et al. p.c.5
Xisa	23°12′30.0″	101°00′09.2″	865		0.23	253.366	0.226307	-9.5	4.37611e+09	Zhou et al. p.c.5
Qingping	25°34′03.2″	100°10′54.6″	904		5.24	23.4171	5.43961	-7.8	7.18279e+09	Zhou et al. p.c.5
Bookshelf faults (BF) & Red River fault (RRF)
Mangka	23°36′07.5″	100°43′39.2″	843		0.04	1045	0.04	–	–	Bo et al. (2015)
Jinggu	23°30′58.4″	100°42′09.7″	833		0.12	1367	0.12	–	–	Bo et al. (2015)
Mankelao	22°41′40.4″	101°22′26.2″	874		0.65	1367	0.65	–	–	Bo et al. (2015)
Zhengdong	22°28′54.1″	101°30′38.5″	880		0.08	583	0.08	–	–	Bo et al. (2015)
Mengla	21°27′33.3″	101°33′51.4″	853		0.29	72.1	0.28	–	–	Bo et al. (2015)
Muangla	20°52′00.7″	102°06′53.3″	889		0.23	864	0.23	–	–	Bo et al. (2015)
Yuanjiang	23°30′53.7″	101°53′55.2″	954		0.08	–	–	-8.4	–	Shen et al. (2007)
Yuanjiang	23°30′53.7″	101°53′55.2″	954		–	–	–	-11.3	–	Dai et al. (1994)
Qudong	23°25′39.0″	099°31′36.0″	776		–	–	–	-11.46	–	Shen et al. (2007)
Mengku	23°36′25.9″	099°56′16.6″	774		0.035	–	–	–	–	Wang et al. (1994)
Lincang	23°50′31.5″	100°03′55.6″	788		0.033	–	–	–	–	Wang et al. (1994)
Lincang	23°50′31.5″	100°03′55.6″	788		–	–	–	-8.5	–	Shen et al. (2007)
Mengping	22°54′48.8″	103°29′19.0″	1088		0.49	23.2	0.47	-4.3	3.96253e+10	Wang et al. (2020)
Nanxing	22°31′58.9″	103°01′42.5″	1030		0.051	377	0.049	-8.1	1.43923e+09	Wang et al. (2020)
Malizhai	22°55'′58.9″	103°25′42.7″	1082		0.462952	143.883	0.458601	-7.84433	3.70305e+08	Wang et al. (2020)
Mapiyi	22°54′07.3″	103°27′26.3″	1087		0.439804	92.1428	0.432489	-15.9225	1.27703e+08	Wang et al. (2020)
Dadipeng	22°59′25.2″	103°21′42.2″	1077		0.396938	147.414	0.392819	-20.1556	5.21047e+07	Wang et al. (2020)
Fengchunling	22°59′52.6″	103°06′53.3″	1058		0.0977342	204.189	0.0926316	-22.0682	6.46811e+07	Wang et al. (2020)
Shilicun	22°42′15.4″	103°17′11.7″	1059		0.13117	43.6356	0.110792	-21.418	1.02066e+09	Wang et al. (2020)
Pu'er	22°39′11.8″	103°02′38.6″	1036		0.0618983	90.7772	0.0514491	-14.4727	1.20937e+09	Wang et al. (2020)
Yangxi	22°45′42.2″	102°45′17.4″	1012		0.10545	168.583	0.0990239	-12.598	9.20563e+08	Wang et al. (2020)
Baiheqiao	22°56′24.4″	103°01′42.5″	1126		0.192039	641.793	0.190778	-9.40967	4.17813e+09	Wang et al. (2020)
Jiasha	23°21′23.0″	102°56′29.4″	1057		0.139743	320.517	0.13705	-14.9597	3.17862e+06	Wang et al. (2020)
Longchacun	23°25′49.1″	102°58′25.7″	1062		0.0672994	220.569	0.0630516	-15.4017	4.72462e+08	Wang et al. (2020)
Yashadi	23°18′58.0″	102°59′41.9″	1058		–	–	–	-19.3	–	Shen et al. (2007)
Shizui	25°19′00.5″	100°30′20.3″	865		0.4	–	–	-8.9	–	Dai et al. (1994)
Midu	25°18′18.5″	100°28′57.2″	863		–	–	–	-10.7	–	Dai et al. (1994)
Midu	25°18′18.5″	100°28′57.2″	863		0.092	–	–	–	–	Wang et al. (1994)
Eryuan	26°07′25.9″	099°57′26.9″	849		0.29	–	–	–	–	Wang et al. (1994)
Eryuan	26°07′25.9″	099°57′26.9″	849		–	–	–	-3.5	–	Dai et al. (1994)
Eryuan	26°07′25.9″	099°57′26.9″	849		–	–	–	-4.2	–	Dai et al. (1994)
Eryuan	26°07′25.9″	099°57′26.9″	849		–	–	–	-3.9	–	Dai et al. (1994)
Niujie	26°15′11.6″	099°59′21.6″	857		–	–	–	-3.3	–	Dai et al. (1994)
Niujie	26°15′11.6″	099°59′21.6″	857		0.15	771	0.15	–	–	Bo et al. (2015)
Jiangyin	26°07′10.4″	100°14′43.4″	876		–	–	–	-7.4	–	Dai et al. (1994)
Pianjiao	26°05′43.0″	100°33′39.0″	905		–	–	–	-13.8	–	Dai et al. (1994)
Dalong	26°04′07.4″	099°26′29.2″	800		0.4	77.6	0.39	–	–	Bo et al. (2015)
Nuodeng	25°53′12.7″	099°22′12.1″	785		0.62	13	0.58	–	–	Bo et al. (2015)
Xiaguan	25°33′59.1″	100°10′53.2″	829		–	–	–	-6.7	–	Wang et al. (1994)
Xiaguan	25°33′59.1″	100°10′53.2″	829		0.69	–	–	–	–	Wang et al. (1994)
Xiaguan	25°33′59.1″	100°10′53.2″	829		0.71	–	–	-8.6	–	Shen et al. (2007)
Niujie	26°15′11.6″	099°59′21.6″	857		0.16	104.034	0.151847	-6.6	2.45734e+11	Zhou et al. (2020)
Niujie	26°15′11.6″	099°59′21.6″	857		0.21	101.346	0.201468	-4.1	2.68975e+11	Zhou et al. (2020)
Niujie	26°15′11.6″	099°59′21.6″	857		0.19	89.4458	0.180842	-5	1.18051e+11	Zhou et al. (2020)
Niujie	26°15′11.6″	099°59′21.6″	857		0.2	73.7064	0.188997	-6.1	3.49921e+10	Zhou et al. (2020)
Niujie	26°15′11.6″	099°59′21.6″	857		0.21	95.9719	0.201682	-4	1.6316e+11	Zhou et al. (2020)
Niujie	26°15′11.6″	099°59′21.6″	857		0.17	88.2941	0.160492	-6.3	2.07773e+11	Zhou et al. (2020)
Eryuan	26°15′11.6″	099°59′21.6″	857		0.2	174.285	0.195383	-3.6	1.46802e+11	Zhou et al. (2020)
Erzhiyuan	26°15′11.6″	099°59′21.6″	857		0.2	109.792	0.192335	-4.1	1.39938e+11	Zhou et al. (2020)
Erzhiyuan	26°15′11.6″	099°59′21.6″	857		0.22	123.612	0.213638	-2.8	1.22654e+11	Zhou et al. (2020)
Erzhiyuan	26°15′11.6″	099°59′21.6″	857		0.18	70.6353	0.165754	-8.1	9.17812e+09	Zhou et al. (2020)
Eryuan	26°07′25.9″	099°57′26.9″	849		0.31	64.4931	0.299133	-8.8	8.70804e+09	Zhou et al. (2020)
Eryuan	26°07′25.9″	099°57′26.9″	849		0.33	64.877	0.317233	-5.8	1.4653e+10	Zhou et al. (2020)
Huangping	26°07′10.4″	100°14′43.4″	876		0.28	500.589	0.278559	-11.4	1.2629e+08	Zhou et al. (2020)
Xingxing	26°07′25.9″	099°57′26.9″	849		0.33	39.9243	0.310233	-6.9	1.8544e+10	Zhou et al. (2020)
Xingxing	26°07′25.9″	099°57′26.9″	849		0.33	52.9765	0.31711	-5.6	2.73405e+10	Zhou et al. (2020)
Xingxing	26°07′25.9″	099°57′26.9″	849		0.33	38.3888	0.31208	-5.6	1.504e+10	Zhou et al. (2020)
Xinping	26°05′51.0″	100°14′21.5″	876		0.26	199.238	0.255509	-9.6	1.71863e+08	Zhou et al. (2020)
Xiashankou	26°05′03.5″	100°01′30.7″	851		0.21	112.095	0.202889	-10.2	2.61525e+08	Zhou et al. (2020)
Xiamiandian	26°03′00.7″	100°14′37.3″	871		0.38	162.384	0.375457	-8.8	1.90389e+08	Zhou et al. (2020)
Xiamiandian	26°03′00.7″	100°14′37.3″	871		0.39	176.204	0.386518	-10.9	1.13845e+08	Zhou et al. (2020)
Xiamiandian	26°03′00.7″	100°14′37.3″	871		0.36	168.911	0.355495	-9.2	1.17235e+08	Zhou et al. (2020)
Shaba	25°48′16.9″	099°55′13.4″	834		0.4	61.422	0.39007	-3.2	1.65636e+11	Zhou et al. (2020)
Shaba	25°48′16.9″	099°55′13.4″	834		0.4	88.2941	0.393127	-4.2	7.015e+10	Zhou et al. (2020)
Shaba	25°48′16.9″	099°55′13.4″	834		0.41	74.8581	0.400322	-4.7	7.35541e+10	Zhou et al. (2020)
Shaba	25°48′16.9″	099°55′13.4″	834		0.4	69.4836	0.391239	-3.8	1.3672e+11	Zhou et al. (2020)
Shaba	25°48′16.9″	099°55′13.4″	834		0.33	65.2609	0.317938	-4.2	1.386e+11	Zhou et al. (2020)
Baizongqi	25°19′00.5″	100°30′20.3″	865		0.38	122.844	0.374912	-11.4	5.63999e+07	Zhou et al. (2020)
Baizongqi	25°19′00.5″	100°30′20.3″	865		0.43	106.721	0.424608	-10.5	7.73286e+07	Zhou et al. (2020)
Baizongqi	25°19′00.5″	100°30′20.3″	865		0.34	99.8108	0.331847	-8.6	1.10251e+08	Zhou et al. (2020)
Gaoqin	25°18′18.5″	100°28′57.2″	860		0.08	60.2703	0.0644779	-14.3	3.64453e+09	Zhou et al. (2020)
Gaoqin	25°18′18.5″	100°28′57.2″	860		0.09	60.6542	0.0714173	-10.8	9.59317e+09	Zhou et al. (2020)
Gaoqin	25°18′18.5″	100°28′57.2″	860		0.1	60.2703	0.0848153	-12.7	6.34191e+09	Zhou et al. (2020)
Gaoqin	25°18′18.5″	100°28′57.2″	860		0.09	56.0476	0.0704266	-12.1	9.69994e+09	Zhou et al. (2020)
Gaoqin	25°18′18.5″	100°28′57.2″	860		0.1	46.0665	0.0763206	-11.6	7.53366e+09	Zhou et al. (2020)
Weibaoshan	25°10′14.2″	100°19′22.8″	840		0.2	372.755	0.19757	-9.6	1.00019e+11	Zhou et al. (2020)
Weibaoshan	25°10′14.2″	100°19′22.8″	840		0.26	379.281	0.258044	-8.2	6.45588e+10	Zhou et al. (2020)
Weibaoshan	25°10′14.2″	100°19′22.8″	840		0.25	376.594	0.248003	-7.3	6.26491e+10	Zhou et al. (2020)
Weibaoshan	25°10′14.2″	100°19′22.8″	840		0.26	360.854	0.257533	-8.5	3.98657e+10	Zhou et al. (2020)
Zhongcang	24°40′52.7″	100°36′29.5″	883		0.12	180.427	0.115096	-7.2	2.84818e+11	Zhou et al. (2020)
Zhongcang	24°40′52.7″	100°36′29.5″	883		0.12	178.892	0.114769	-5.2	5.71832e+10	Zhou et al. (2020)
Yuanjiang	23°30′53.7″	101°53′55.2″	954		0.04	261.427	0.0363138	-14.1	1.92037e+08	Zhou et al. (2020)
Yuanjiang	23°30′53.7″	101°53′55.2″	954		0.05	235.707	0.0459524	-12.3	3.52098e+07	Zhou et al. (2020)
Yuanjiang	23°30′53.7″	101°53′55.2″	954		0.05	220.351	0.0447743	-8.6	2.05923e+08	Zhou et al. (2020)
Yuanjiang	23°30′53.7″	101°53′55.2″	954		0.05	238.01	0.0452735	-14.2	8.36344e+07	Zhou et al. (2020)
Jiasha	23°21′23.0″	102°56′29.4″	1057		0.17	215.361	0.166128	-23.6	1.43951e+06	Zhou et al. (2020)
Hujie	23°19′32.9″	102°29′06.6″	1004		0.62	177.356	0.617845	-11.5	1.73618e+08	Zhou et al. (2020)
Poduo	23°10′25.9″	102°41′43.0″	1021		0.27	139.351	0.264724	-10.9	4.06847e+06	Zhou et al. (2020)
Poduo	23°10′25.9″	102°41′43.0″	1021		0.29	121.692	0.283012	-15.6	4.32574e+06	Zhou et al. (2020)
Poduo	23°10′25.9″	102°41′43.0″	1021		0.3	119.005	0.293024	-15.3	2.48625e+07	Zhou et al. (2020)
Xiaomadian	22°59′25.2″	103°21′42.2″	1077		0.4	163.152	0.3963	-16.8	1.11684e+07	Zhou et al. (2020)
Baiheqiao	22°56′24.4″	103°01′42.5″	1126		0.21	2020.02	0.209605	-11.4	4.8556e+09	Zhou et al. (2020)
Baiheqiao	22°56′24.4″	103°01′42.5″	1126		0.12	28.0238	0.0874361	-4.5	1.42051e+12	Zhou et al. (2020)
Malizhai	22°55'′58.9″	103°25′42.7″	1082		0.35	172.365	0.345525	-12.2	1.70311e+08	Zhou et al. (2020)
Malizhai	22°55'′58.9″	103°25′42.7″	1082		0.48	149.716	0.476503	-9.8	2.39169e+08	Zhou et al. (2020)
Malizhai	22°55'′58.9″	103°25′42.7″	1082		0.46	172.365	0.456849	-11.7	5.66646e+07	Zhou et al. (2020)
Malizhai	22°55'′58.9″	103°25′42.7″	1082		0.49	157.778	0.486217	-7.8	2.45678e+08	Zhou et al. (2020)
Malizhai	22°55'′58.9″	103°25′42.7″	1082		0.5	145.877	0.495994	-13	1.14021e+08	Zhou et al. (2020)
Mengping	22°54′48.8″	103°29′19.0″	1088		0.34	108.64	0.333868	-9.3	3.47287e+09	Zhou et al. (2020)
Mengping	22°54′48.8″	103°29′19.0″	1088		0.56	67.5642	0.55339	-7.6	4.25648e+09	Zhou et al. (2020)
Mengping	22°54′48.8″	103°29′19.0″	1088		0.45	181.963	0.446961	-10.7	1.21122e+08	Zhou et al. (2020)
Mengping	22°54′48.8″	103°29′19.0″	1088		0.46	49.9054	0.446949	-9.9	2.91109e+10	Zhou et al. (2020)
Mengping	22°54′48.8″	103°29′19.0″	1088		0.54	95.9719	0.535156	-11.3	5.59599e+09	Zhou et al. (2020)
Anninghe-Xiaojiang fault (AXF)
Mile	24°24′06.4″	103°26′29.5″	1131		0.022	–	–	-12.5	–	Dai et al. (1994)
Panxi	24°13′16.3″	103°06′10.7″	1097		0.011	–	–	-16.3	–	Dai et al. (1994)
Anning	24°57′49.0″	102°26′58.5″	1072		0.025	–	–	-14.7	–	Dai et al. (1994)
Anning	24°57′49.0″	102°26′58.5″	1072		0.043	64.4	0.028	-21.2	1.82493e+08	Shen et al. (2007)
Baiyukou	24°48′21.8″	102°39′03.3″	1077		0.071	–	–	-21.9	–	Shen et al. (2007)
Haikou	24°30′52.9″	102°56′17.7″	1087		0.054	–	–	-19.5	–	Shen et al. (2007)
Tangchi	24°57′39.4″	103°02′18.2″	1114		0.049	–	–	-21.4	2.19701e+11	Shen et al. (2007)
Tonghai	24°06′57.4″	102°45′38.2″	1060		–	–	–	-19.2	–	Shen et al. (2007)
Qujiang	23°56′12.9″	102°47′49.1″	1056		–	–	–	-18.9	–	Shen et al. (2007)
Huanglongsi	23°38′52.0″	102°46′08.2″	1044		–	–	–	-23.6	–	Shen et al. (2007)
Wuzhe	24°36′26.0″	103°52′53.0″	1181		–	–	–	-18.7	–	Shen et al. (2007)
Penzhuchi	23°43′15.5″	102°29′15.3″	1018		0.056	1601	0.055	-5	3.60798e+10	Gao and Zhang (2001)
Puge	27°24′02.9″	102°32′19.9″	1136		0.04	394	0.038	-12.2	1.30584e+09	Zhou et al. (2015)
Puge	27°24′02.9″	102°32′19.9″	1136		0.07	451	0.068	-10.8	6.18808e+08	Zhou et al. (2015)
Puge	27°24′02.9″	102°32′19.9″	1136		0.014	–	–	-9.8	–	Du et al. (2006)
Chuanxing	27°51′34.4″	102°19′22.7″	1126		0.014	–	–	–	–	Du et al. (2006)
Satellite Hotel	27°53′13.0″	102°14′45.3″	1126		0.014	–	–	–	–	Du et al. (2006)
Taihe	27°53′13.0″	102°14′45.3″	1126		–	–	–	-11.6	–	Zhou et al. (2015)
Zhaojue	28°03′56.8″	102°54′13.1″	1192		0.16	83.7	0.15	-13.8	7.8907e+07	Zhou et al. (2015)
Zhaojue	28°03′56.8″	102°54′13.1″	1192		0.02	54.4	0.005	-13.4	–	Zhou et al. (2015)
Hongmo	28°05′19.1″	102°14′31.5″	1134		0.11	2013	0.11	-9.8	5.31383e+07	Zhou et al. (2015)
Hongmo	28°05′19.1″	102°14′31.5″	1134		0.11	4097	0.11	-9.9	3.60014e+07	Zhou et al. (2015)
Xide	28°19′27.4″	102°22′33.0″	1156		0.1	1039	0.099	-8.8	8.27156e+08	Zhou et al. (2015)
Ludian	26°59′15.6″	103°26′42.9″	1256		0.012	–	–	–	–	Wang et al. (2018)
Gongyicun	29°03′05.5″	102°21′35.7″	1190		0.05	3803	0.05	–	–	Zhou et al. (2015)
Gongyicun	29°03′05.5″	102°21′35.7″	1190		0.15	1617	0.15	-2.9	3.57504e+06	Zhou et al. (2015)
Dizhentai	29°13′11.2″	102°21′58.1″	1196		0.15	111	0.14	-14.3	–	Zhou et al. (2015)
Dizhentai	29°13′11.2″	102°21′58.1″	1196		–	–	–	-7.5	–	Zhou et al. (2015)
Xiaozhaicun	23°58′41.4″	103°19′55.2″	1114		0.251194	6.2822	0.109434	-16.9722	1.98697e+10	Wang et al. (2020)
Gulecun	23°59′54.2″	104°25′57.8″	1220		0.102878	56.1794	0.0834431	-12.643	2.27814e+09	Wang et al. (2020)
Panzhihua	23°25′44.2″	104°09′05.1″	1170		0.199755	9.17982	0.101923	-20.5965	5.34701e+09	Wang et al. (2020)
Baishapo	23°25′44.2″	104°09′05.1″	1170		0.0616412	49.9682	0.0424785	-19.958	2.50118e+09	Wang et al. (2020)
Reshuicun	23°31′52.2″	104°03′16.8″	1168		0.181751	8.44461	0.0718398	-17.675	1.44343e+10	Wang et al. (2020)
Chenjiazhai	23°21′15.5″	103°58′50.7″	1149		0.0968769	145.588	0.0906307	-24.3915	1.52022e+07	Wang et al. (2020)
Erhegou	23°17′53.1″	103°58′04.8″	1147		0.0985915	967.064	0.0974671	-6.855	2.84581e+08	Wang et al. (2020)
Yaodian	23°17′53.1″	103°58′04.8″	1147		0.107165	854.6	0.105895	-10.2767	1.16319e+08	Wang et al. (2020)
Xinfa	23°19′17.4″	103°47′46.8″	1133		0.162033	832.446	0.161025	-9.4986	2.40052e+08	Wang et al. (2020)
Xianshuihe fault (XSHF)
Ganzi	31°34′58.9″	100°02′37.5″		549	0.19	146	0.18	-13.7	2.34743e+08	Zhou et al. (2015)
Ganzi	31°34′58.9″	100°02′37.5″		549	0.23	123	0.22	-14.2	2.54509e+08	Zhou et al. (2015)
Ganzi	31°34′58.9″	100°02′37.5″		549	0.18	110	0.17	-11.7	–	Zhou et al. (2015)
Ganzi	31°34′58.9″	100°02′37.5″		549	0.2	94.8	0.19	-12	6.77796e+08	Zhou et al. (2015)
Ganzi	31°34′58.9″	100°02′37.5″		549	–	–	–	-2.9	–	Dai et al. (1994)
Ganzi	31°34′58.9″	100°02′37.5″		549	–	–	–	-2.5	–	Dai et al. (1994)
Ganzi	31°34′58.9″	100°02′37.5″		549	–	–	–	-3.6	–	Dai et al. (1994)
Ganzi	31°34′58.9″	100°02′37.5″		549	–	–	–	-4.8	–	Dai et al. (1994)
Ganzi	31°34′58.9″	100°02′37.5″		549	–	–	–	-4.2	–	Dai et al. (1994)
Lianghekou	29°32′08.8″	102°08′29.4″		556	–	–	–	-5.3	7.99463e+10	Zhou et al. (2015)
Lianghekou	29°32′08.8″	102°08′29.4″		556	–	–	–	-7.2	–	Zhou et al. (2015)
Lianghekou	29°32′08.8″	102°08′29.4″		556	–	–	–	-3.5	–	Zhou et al. (2015)
Caoke	29°23′24.2″	101°57′28.2″		534	0.88	27.1	0.87	-11.9	–	Zhou et al. (2015)
Caoke	29°23′24.2″	101°57′28.2″		534	1.16	40	1.17	-12.3	–	Zhou et al. (2015)
Erhaoyingdi	29°35′21.7″	102°01′37.5″		549	1.39	–	–	-3.3	–	Du et al. (2006)
Erhaoyingdi	29°35′21.7″	102°01′37.5″		549	1.45	86.7	1.46	-5.3	–	Zhou et al. (2015)
Gonghecun	29°37′07.7″	102°06′32.9″		557	1.16	203	1.16	-14.9	6.86084e+07	Zhou et al. (2015)
Gonghecun	29°37′07.7″	102°06′32.9″		557	1.39	168	1.39	-12.1	3.41401e+07	Zhou et al. (2015)
Gonghecun	29°37′07.7″	102°06′32.9″		557	–	–	–	-10	–	Du et al. (2006)
Gongga	29°37′07.7″	102°06′32.9″		557	1.22	10.8	1.24	-11.6	–	Shen et al. (2007)
Xinxing	29°45′14.0″	102°03′36.0″		560	0.58	418	1.07	-12.8	3.51889e+07	Zhou et al. (2015)
Xinxing	29°45′14.0″	102°03′36.0″		560	1.07	433	1.28	-13.1	2.82973e+07	Zhou et al. (2015)
Zheduotang	29°59′32.4″	101°53′18.4″		559	–	–	–	-14	–	Zhou et al. (2015)
Guanding	29°57′06.5″	101°57′40.4″		563	–	–	–	-7.4	–	Zhou et al. (2015)
Guanding	29°57′06.5″	101°57′40.4″		563	2.85	100	2.87	-8	1.11418e+11	Zhou et al. (2015)
Guanding	29°57′06.5″	101°57′40.4″		563	3.73	48	3.79	-7.5	4.75659e+10	Zhou et al. (2015)
Guanding	29°57′06.5″	101°57′40.4″		563	–	–	1.85	–	–	Tang et al. (2017)
Guanding	29°57′06.5″	101°57′40.4″		563	–	–	2.44	–	–	Tang et al. (2017)
Guanding	29°57′06.5″	101°57′40.4″		563	–	–	0.86	–	–	Tang et al. (2017)
Guanding	29°57′06.5″	101°57′40.4″		563	–	–	2.48	–	–	Tang et al. (2017)
Longtougou	29°58′45.0″	101°57′26.0″		564	1.43	–	–	-4.4	–	Du et al. (2006)
Longtougou	29°58′45.0″	101°57′26.0″		564	1.43	13.7	1.47	-7.5	–	Zhou et al. (2015)
Longtougou	29°58′45.0″	101°57′26.0″		564	0.9	20.3	0.9	-7.9	8.1692e+11	Zhou et al. (2015)
Erdaoqiao	30°05′15.7″	101°56′59.3″		569	2.59	–	–	-4.1	–	Du et al. (2006)
Erdaoqiao	30°05′15.7″	101°56′59.3″		569	2.71	71.6	2.73	-6.5	8.53106e+10	Zhou et al. (2015)
Erdaoqiao	30°05′15.7″	101°56′59.3″		569	2.89	45.3	2.94	-7.5	7.45523e+10	Zhou et al. (2015)
Zhonggu	30°15′10.5″	101°52′55.5″		573	–	–	1.34	–	–	Tang et al. (2017)
Zhonggu	30°15′10.5″	101°52′55.5″		573	–	–	1.53	–	–	Tang et al. (2017)
Zhonggu	30°15′10.5″	101°52′55.5″		573	–	–	1.37	–	–	Tang et al. (2017)
Zhonggu	30°15′10.5″	101°52′55.5″		573	–	–	0.99	–	–	Tang et al. (2017)
Zhonggu	30°15′10.5″	101°52′55.5″		573	–	–	0.99	–	–	Tang et al. (2017)
Zhonggu	30°15′10.5″	101°52′55.5″		573	–	–	1.37	–	–	Tang et al. (2017)
Maoniugou	30°46′44.2″	101°41′25.5″		570	0.34	146	0.34	-8	1.0249e+12	Zhou et al. (2015)
Longpugou	30°57′10.8″	101°14′28.1″		568	–	–	–	-5.7	–	Du et al. (2006)
Longpugou	30°57′10.8″	101°14′28.1″		568	–	–	–	-10.1	–	Zhou et al. (2015)
Longpugou	30°57′10.8″	101°14′28.1″		568	0.19	115	0.18	-10	–	Zhou et al. (2015)
Longpugou	30°57′10.8″	101°14′28.1″		568	0.22	101	0.21	-8.8	1.77394e+10	Zhou et al. (2015)
Luhuo	31°15′52.3″	100°47′43.3″		559	–	–	–	-5.3	3.10075e+12	Zhou et al. (2015)
Luhuo	31°15′52.3″	100°47′43.3″		559	–	–	–	-7	–	Zhou et al. (2015)
Litang fault (LTF)
Maoniuchang	30°28′25.6″	099°31′07.4″		426	–	–	0.7	–	–	Tang et al. (2017)
Maoniuchang	30°28′25.6″	099°31′07.4″		426	–	–	0.65	–	–	Tang et al. (2017)
Maoniuchang	30°28′25.6″	099°31′07.4″		426	–	–	0.83	–	–	Tang et al. (2017)
Maoniuchang	30°28′25.6″	099°31′07.4″		426	–	–	0.76	–	–	Tang et al. (2017)
Maoniuchang	30°28′25.6″	099°31′07.4″		426	–	–	0.46	–	–	Tang et al. (2017)
Maoniuchang	30°28′25.6″	099°31′07.4″		426	–	–	–	-7.1	–	Zhou et al. (2017)
Rekeng	30°24′10.6″	099°23′08.3″		410	0.22	24.5	0.19	-3.7	9.47723e+10	Tian et al. (2018)
Rekeng	30°24′10.6″	099°23′08.3″		410	0.2	39.8	0.18	-4.7	1.66306e+10	Tian et al. (2018)
Rekeng	30°24′10.6″	099°23′08.3″		410	0.21	25	0.18	-2.9	–	Tian et al. (2018)
Rekeng	30°24′10.6″	099°23′08.3″		410	0.18	155	0.17	-2.1	–	Tian et al. (2018)
Rekeng	30°24′10.6″	099°23′08.3″		410	0.2	52.1	0.18	-3.9	1.51007e+10	Tian et al. (2018)
Rekeng	30°24′10.6″	099°23′08.3″		410	–	–	–	-7.7	1.40844e+11	Tian et al. (2018)
Rekeng	30°24′10.6″	099°23′08.3″		410	–	–	–	-2.7	–	Tian et al. (2018)
Rekeng	30°24′10.6″	099°23′08.3″		410	–	–	–	-4.4	3.49085e+10	Tian et al. (2018)
Rekeng	30°24′10.6″	099°23′08.3″		410	–	–	–	-2.6	5.71547e+11	Tian et al. (2018)
Rekeng	30°24′10.6″	099°23′08.3″		410	–	–	–	-0.3	4.98433e+10	Tian et al. (2018)
Rekeng	30°24′10.6″	099°23′08.3″		410	0.18	155	0.17	-10.7	–	Zhou et al. (2017)
Rekeng	30°24′10.6″	099°23′08.3″		410	0.3	57.2	0.29	-5.1	8.76474e+10	Zhou et al. (2017)
Rekeng	30°24′10.6″	099°23′08.3″		410	0.17	325	0.17	–	1.48371e+10	Zhou et al. (2017)
Rekeng	30°24′10.6″	099°23′08.3″		410	–	–	–	-9.3	–	Zhou et al. (2017)
Deda	30°16′01.0″	099°27′16.7″		403	–	–	–	-4.5	2.63949e+11	Zhou et al. (2017)
Deda	30°16′01.0″	099°27′16.7″		403	0.14	196	0.14	-6.5	–	Zhou et al. (2017)
Deda	30°16′01.0″	099°27′16.7″		403	0.16	193	0.16	-7.1	1.57852e+11	Zhou et al. (2017)
Deda	30°16′01.0″	099°27′16.7″		403	0.19	128	0.18	-4.3	1.27521e+11	Zhou et al. (2017)
CCM	30°16′50.8″	099°20′24.8″		397	0.24	152	0.24	-5.7	1.51135e+11	Zhou et al. (2017)
Gangrilong	30°13′06.6″	099°19′11.4″		390	–	–	–	-4	7.14851e+11	Zhou et al. (2017)
Litang	29°59′28.9″	100°13′08.5″		425	–	–	0.95	–	–	Tang et al. (2017)
Litang	29°59′28.9″	100°13′08.5″		425	–	–	0.79	–	–	Tang et al. (2017)
Litang	29°59′28.9″	100°13′08.5″		425	–	–	1.03	–	–	Tang et al. (2017)
Litang	29°59′28.9″	100°13′08.5″		425	–	–	0.36	–	–	Tang et al. (2017)
Kahui	29°56′36.5″	100°12′55.1″		422	–	–	0.08	–	–	Tang et al. (2017)
Kahui	29°56′36.5″	100°12′55.1″		422	–	–	0.1	–	–	Tang et al. (2017)
Kahui	29°56′36.5″	100°12′55.1″		422	0.12	141	0.11	-13.6	1.40269e+07	Zhou et al. (2017)
Heni	30°13′58.1″	099°52′07.9″		416	0.93	5.37	0.91	-6.1	3.13969e+11	Zhou et al. (2017)
Heni	30°13′58.1″	099°52′07.9″		416	–	–	–	-5.6	2.04091e+12	Zhou et al. (2017)
Heni	30°13′58.1″	099°52′07.9″		416	–	–	–	-3.6	–	Zhou et al. (2017)
Heni	30°13′58.1″	099°52′07.9″		416	–	–	–	-5	–	Zhou et al. (2017)
Qukailong	30°04′35.3″	100°08′26.5″		425	–	–	–	-6.7	1.98307e+11	Zhou et al. (2017)
Daoban	30°02′14.6″	100°08′29.0″		424	–	–	–	-18.5	–	Zhou et al. (2017)
Daoban	30°02′14.6″	100°08′29.0″		424	–	–	–	-3.9	–	Zhou et al. (2017)
MYS	29°59′28.9″	100°13′08.5″		426	0.23	66	0.22	-5.9	1.2291e+12	Zhou et al. (2017)
MYS	29°59′28.9″	100°13′08.5″		426	0.24	28.4	0.21	-5.4	6.6947e+11	Zhou et al. (2017)
MYS	29°59′28.9″	100°13′08.5″		426	0.27	26.1	0.24	-4.5	6.41956e+11	Zhou et al. (2017)
MYS	29°59′28.9″	100°13′08.5″		426	–	–	–	-3.5	4.31255e+11	Zhou et al. (2017)
Maoya	29°59′43.7″	100°12′47.4″		426	–	–	–	-6.7	–	Zhou et al. (2017)
Maoya	29°59′43.7″	100°12′47.4″		426	0.27	63	0.26	-19.2	3.87524e+11	Zhou et al. (2017)
Chaka	29°41′33.0″	100°23′59.1″		420	–	–	–	-6	–	Zhou et al. (2017)
Chaka	29°41′33.0″	100°23′59.1″		420	–	–	–	-6.4	1.01441e+12	Zhou et al. (2017)
Chaka	29°41′33.0″	100°23′59.1″		420	–	–	–	-4.8	–	Zhou et al. (2017)
Dewu	29°27′27.3″	100°35′46.3″		421	–	–	–	-6.7	1.01742e+13	Zhou et al. (2017)
Jiawa	29°47′04.2″	100°24′54.1″		427	0.24	39.5	0.22	-4.3	3.17566e+11	Zhou et al. (2017)
Xiamula	29°35′13.5″	100°39′17.6″		434	0.34	176	0.34	-2.3	9.14086e+10	Zhou et al. (2017)
Rekeng	30°24′10.6″	099°23′08.3″		410	0.17	324.769	0.167436	–	2.78759e+10	Zhou et al. (2020)
CCM	30°16′50.8″	099°20′24.8″		397	0.24	152.019	0.234487	-5.7	2.41308e+11	Zhou et al. (2020)
CCM	30°16′50.8″	099°20′24.8″		397	0.17	153.939	0.164573	-6.1	2.00606e+11	Zhou et al. (2020)
CCM	30°16′50.8″	099°20′24.8″		397	0.18	142.806	0.174217	-5.9	1.90813e+11	Zhou et al. (2020)
CCM	30°16′50.8″	099°20′24.8″		397	0.22	134.361	0.214151	-7.6	1.59658e+11	Zhou et al. (2020)
Deda	30°16′01.0″	099°27′16.7″		403	0.16	193.095	0.155627	-7.1	1.76794e+11	Zhou et al. (2020)
Deda	30°16′01.0″	099°27′16.7″		403	0.19	127.835	0.183614	-4.3	2.08934e+11	Zhou et al. (2020)
Deda	30°16′01.0″	099°27′16.7″		403	0.16	189.257	0.155538	-4.7	1.3286e+11	Zhou et al. (2020)
Deda	30°16′01.0″	099°27′16.7″		403	0.16	171.598	0.154667	-5.1	1.1366e+11	Zhou et al. (2020)
Deda	30°16′01.0″	099°27′16.7″		403	0.19	188.105	0.185671	-5.6	1.11401e+11	Zhou et al. (2020)
Bogexi	30°07′02.3″	099°24′36.0″		389	0.2	46.0665	0.182248	-12.3	–	Zhou et al. (2020)
Three Rivers faults (TRF)
Xinzhi	26°33′34.3″	099°35′04.8″		237	–	–	–	-8.3	–	Dai et al. (1994)
Xinhe	26°33′34.3″	099°35′04.8″		237	0.034	400	0.031	–	–	Bo et al. (2015)
Houdian	26°26′09.0″	099°37′36.0″		238	–	–	–	-6.4	–	Dai et al. (1994)
Weixi	27°09′15.0″	099°19′16.0″		211	0.2	–	–	-9	–	Shen et al. (2007)
Zhongdian	27°46′47.6″	099°51′18.4″		278	0.38	–	–	–	–	Wang et al. (1994)
Zhongdian	27°46′47.6″	099°51′18.4″		278	0.3	–	–	–	–	Wang et al. (1994)
Sangke	27°46′47.6″	099°51′18.4″		268	–	–	–	-21	–	Li et al. (2018)
Mangkang	29°44′51.0″	098°55′15.0″		241	0.09	–	–	–	–	Wang et al. (1994)
Baishuitai	27°30′06.0″	100°01′56.0″		287	–	–	–	-9.4	–	Shen et al. (2007)
Baishuitai	27°30′06.0″	100°01′56.0″		287	–	–	–	-11.5	–	Shen et al. (2007)
Baishuitai	27°30′06.0″	100°01′56.0″		287	–	–	–	-12.2	–	Shen et al. (2007)
Baishuitai	27°30′06.0″	100°01′56.0″		287	–	–	–	-3.5	–	Shen et al. (2007)
Baishuitai	27°30′06.0″	100°01′56.0″		287	–	–	–	-8.4	–	Shen et al. (2007)
Xiagei	27°47′50.6″	099°48′51.1″		278	–	–	–	-4.2	–	Shen et al. (2007)
Tianshengqiao	27°47′50.6″	099°48′51.1″		273	–	–	–	-3.2	–	Shen et al. (2007)
Lunan	27°10′40.0″	100°04′19.0″		286	–	–	–	-6.8	–	Shen et al. (2007)
Lunan	27°10′40.0″	100°04′19.0″		286	0.25	57.5	0.24	-2	6.17143e+10	Li et al. (2018)
Xiagei	27°47′50.6″	099°48′51.1″		278	–	–	–	-1.9	–	Li et al. (2018)
Tianshengqiao	27°47′50.6″	099°48′51.1″		273	–	–	–	-2.6	–	Li et al. (2018)
Caquka	27°58′19.6″	099°49′57.4″		280	0.25	164	0.25	-3.3	6.99209e+09	Li et al. (2018)
Niyongka	27°57′51.8″	099°49′37.6″		280	0.26	269	0.26	-6	1.36883e+09	Li et al. (2018)
Shangqiaotou	28°10′13.4″	099°23′50.6″		250	–	–	–	-22.1	–	Li et al. (2018)
Derongcaqu	28°43′28.9″	099°08′18.2″		258	–	–	–	-24.4	–	Li et al. (2018)
Lebugong	29°12′40.3″	098°39′02.5″		254	–	–	–	-10.6	–	Li et al. (2018)
Yanjing	29°02′48.8″	098°35′37.0″		237	–	–	–	-3.8	–	Li et al. (2018)
Adong	28°33′52.6″	098°51′19.8″		225	–	–	–	-4.9	–	Li et al. (2018)
Maomaorong	28°39′46.8″	099°03′41.8″		248	0.09	251	0.086	-6.4	–	Li et al. (2018)
Lajiuxue	29°07′04.4″	098°37′39.4″		244	0.08	185	0.075	-4.6	2.35888e+10	Li et al. (2018)
Qizhika	29°05′21.5″	098°36′21.6″		241	0.12	101	0.11	-17.3	2.76306e+08	Li et al. (2018)
Sinong	28°31′35.8″	098°47′38.0″		218	0.25	55.3	0.24	-7.1	1.04485e+11	Li et al. (2018)
Xidang	28°25′34.7″	098°48′45.4″		214	0.3	191	0.3	-9.2	5.03862e+10	Li et al. (2018)
Yongzhi	28°11′43.1″	098°49′19.2″		200	0.24	206	0.24	-11.3	1.38828e+11	Li et al. (2018)
Liduguang	27°45′47.5″	099°11′03.8″		213	0.11	86	0.1	-6.2	6.31569e+10	Li et al. (2018)
Jiangda	31°31′20.7″	098°10′26.8″		420	0.14	119.389	0.132736	-9	2.26658e+09	Zhou et al. (2020)
Jiangda	31°31′20.7″	098°10′26.8″		420	0.15	111.711	0.140775	-8.8	1.55061e+09	Zhou et al. (2020)
Dangyong	31°22′58.4″	097°49′51.0″		390	0.08	514.409	0.0782081	-7.2	1.35071e+10	Zhou et al. (2020)
Youzhacun	30°43′58.4″	098°24′12.2″		373	0.04	69.0998	0.025903	-13.3	1.42032e+09	Zhou et al. (2020)
Dengzhuduo	30°37′18.8″	099°10′34.0″		412	0.15	115.55	0.14258	-5.8	1.88498e+11	Zhou et al. (2020)
Dengzhuduo	30°37′18.8″	099°10′34.0″		412	0.15	87.5264	0.140176	-5.4	1.80866e+11	Zhou et al. (2020)
Awang	30°32′08.5″	098°33′22.3″		366	0.18	150.484	0.174514	-6	1.39699e+11	Zhou et al. (2020)
Awang	30°32′08.5″	098°33′22.3″		366	0.09	69.4836	0.0767122	-6.9	1.00917e+11	Zhou et al. (2020)
Hagexi	29°58′11.3″	099°10′48.4″		361	0.25	15.3555	0.197755	-5.9	3.50708e+12	Zhou et al. (2020)
Hagexi	29°58′11.3″	099°10′48.4″		361	0.28	10.365	0.203118	-5.1	2.03291e+12	Zhou et al. (2020)
Hagexi	29°58′11.3″	099°10′48.4″		361	0.24	19.5783	0.199092	-6.6	6.11991e+12	Zhou et al. (2020)
Chashuzhan	29°58′10.6″	099°04′42.6″		354	0.26	22.6494	0.225819	-6.2	4.15477e+10	Zhou et al. (2020)
Pulong	29°37′57.0″	098°37′04.4″		296	0.05	147.029	0.0434944	-10	1.78274e+09	Zhou et al. (2020)
Pulong	29°37′57.0″	098°37′04.4″		296	0.06	122.844	0.050594	-10.6	9.45054e+08	Zhou et al. (2020)
Qizhika	29°05′21.5″	098°36′21.6″		241	0.11	142.806	0.103724	-11.8	1.88052e+08	Zhou et al. (2020)
Qizhika	29°05′21.5″	098°36′21.6″		241	0.11	143.958	0.102672	-12.6	1.36588e+08	Zhou et al. (2020)
Maomaorong	28°39′46.8″	099°03′41.8″		248	0.09	342.044	0.0867845	-9.2	2.34547e+10	Zhou et al. (2020)
Maomaorong	28°39′46.8″	099°03′41.8″		248	0.09	441.855	0.087543	-7	7.90192e+09	Zhou et al. (2020)
Shangqiaotou	28°10′13.4″	099°23′50.6″		250	0.13	34.5499	0.0993697	-12.6	2.9624e+08	Zhou et al. (2020)
Shangqiaotou	28°10′13.4″	099°23′50.6″		250	0.2	479.859	0.197998	-5.6	8.98251e+09	Zhou et al. (2020)
Niyongka	27°57′51.8″	099°49′37.6″		280	0.21	459.897	0.208278	-2.9	5.23596e+09	Zhou et al. (2020)
Tianshengqiao	27°47′50.6″	099°48′51.1″		273	0.16	33.3982	0.134073	-5.3	5.8893e+12	Zhou et al. (2020)
Tianshengqiao	27°47′50.6″	099°48′51.1″		273	0.14	33.7821	0.113766	-2.1	8.98415e+12	Zhou et al. (2020)
Tianshengqiao	27°47′50.6″	099°48′51.1″		273	0.15	28.7916	0.119258	-3.3	6.05609e+12	Zhou et al. (2020)
Tianshengqiao	27°47′50.6″	099°48′51.1″		273	0.24	13.0522	0.176941	-2.7	1.72249e+12	Zhou et al. (2020)
Xiagei	27°47′50.6″	099°48′51.1″		278	0.44	5.37443	0.311983	-1.9	5.442e+12	Zhou et al. (2020)
Xiagei	27°47′50.6″	099°48′51.1″		278	0.14	32.2466	0.112477	-4.9	5.32164e+12	Zhou et al. (2020)
Liduguang	27°45′47.5″	099°11′03.8″		213	0.08	568.537	0.078379	-7.4	1.54298e+11	Zhou et al. (2020)
Liduguang	27°45′47.5″	099°11′03.8″		213	0.08	547.04	0.0783151	-6	7.29414e+10	Zhou et al. (2020)
Sangke	27°46′47.6″	099°51′18.4″		268	0.39	9.2133	0.298492	-11.9	1.83735e+09	Zhou et al. (2020)
Lunan	27°10′40.0″	100°04′19.0″		286	0.22	105.953	0.21191	-6	1.3831e+11	Zhou et al. (2020)
Lunan	27°10′40.0″	100°04′19.0″		286	0.28	110.176	0.273405	-3.4	1.4493e+11	Zhou et al. (2020)
Lunan	27°10′40.0″	100°04′19.0″		286	0.28	108.64	0.273311	-4.7	1.29912e+11	Zhou et al. (2020)
Lunan	27°10′40.0″	100°04′19.0″		286	0.31	85.9908	0.301881	-3.2	6.60377e+10	Zhou et al. (2020)
Dadongxiang	27°10′12.0″	100°25′27.8″		318	0.1	55.2798	0.0834192	-6.3	1.31748e+10	Zhou et al. (2020)
Dadongxiang	27°10′12.0″	100°25′27.8″		318	0.09	51.8248	0.0720954	-5.4	1.53914e+10	Zhou et al. (2020)
Qiaotou	26°51′06.5″	099°24′23.4″		216	0.24	114.015	0.233275	-7.1	5.68043e+09	Zhou et al. (2020)
Qiaotou	26°51′06.5″	099°24′23.4″		216	0.21	154.707	0.203829	-4.9	1.82785e+10	Zhou et al. (2020)
Aheji	26°46′25.7″	099°26′24.4″		219	0.37	65.6448	0.358371	-5.2	1.4581e+11	Zhou et al. (2020)
Aheji	26°46′25.7″	099°26′24.4″		219	0.37	31.4788	0.34933	-3.9	2.37951e+11	Zhou et al. (2020)
Xinzhi	26°33′34.3″	099°35′04.8″		237	0.04	47.2182	0.0155667	-12.1	6.65649e+09	Zhou et al. (2020)
Xinzhi	26°33′34.3″	099°35′04.8″		237	0.04	41.076	0.0160455	-11.5	4.59553e+09	Zhou et al. (2020)
Madeng	26°26′09.0″	099°37′36.0″		238	0.09	200.005	0.0854273	-8.2	5.06141e+09	Zhou et al. (2020)
Madeng	26°26′09.0″	099°37′36.0″		238	0.08	205.764	0.075507	-8.7	5.7983e+09	Zhou et al. (2020)
Madeng	26°26′09.0″	099°37′36.0″		238	0.08	187.337	0.0740958	-8.6	4.36235e+09	Zhou et al. (2020)
Sichuan basin (SB)
Wolonghe	30°14′26.8″	106°57′31.7″		1020	–	–	0.008	–	1.92744e+09	Dai et al. (2008)
Wolonghe	30°14′26.8″	106°57′31.7″		1020	–	–	0.003	–	3.23661e+09	Dai et al. (2008)
Wolonghe	30°14′26.8″	106°57′31.7″		1020	–	–	0.035	–	1.36905e+10	Dai et al. (2008)
Wolonghe	30°14′26.8″	106°57′31.7″		1020	–	–	0.015	–	6.12245e+07	Dai et al. (2008)
Wolonghe	30°14′26.8″	106°57′31.7″		1020	–	–	0.014	–	1.44499e+09	Ni et al. (2014)
Wolonghe	30°14′26.8″	106°57′31.7″		1020	–	–	0.012	–	4.7619e+09	Ni et al. (2014)
Wolonghe	30°14′26.8″	106°57′31.7″		1020	–	–	0.012	–	3.73377e+09	Ni et al. (2014)
Wolonghe	30°14′26.8″	106°57′31.7″		1020	–	–	0.01	–	1.93182e+09	Ni et al. (2014)
Wolonghe	30°14′26.8″	106°57′31.7″		1020	–	–	0.004	–	7.87202e+10	Ni et al. (2014)
Tongluoxia	29°35′25.5″	106°39′47.4″		972	–	–	0.026	–	1.5528e+08	Ni et al. (2014)
Shaguanping	30°28′18.3″	107°26′49.0″		1072	–	–	0.02	–	2.01299e+09	Ni et al. (2014)
Shaguanping	30°28′18.3″	107°26′49.0″		1072	–	–	0.028	–	3.51474e+08	Ni et al. (2014)
Shaguanping	30°28′18.3″	107°26′49.0″		1072	–	–	0.011	–	2.88849e+09	Wu et al. (2013)
Xinshi	29°57′13.7″	107°06′04.1″		1022	–	–	0.007	–	8.16327e+09	Wu et al. (2013)
Shuanglong	29°57′23.3″	107°12′33.7″		1034	–	–	0.011	–	3.63636e+08	Wu et al. (2013)
Fuchengzhai	30°42′25.9″	107°12′03.2″		1057	–	–	0.005	–	1.20476e+10	Wu et al. (2013)
Fuchengzhai	30°42′25.9″	107°12′03.2″		1057	–	–	0.004	–	1.38249e+09	Wu et al. (2013)
Gaofengchang	30°42′31.9″	108°19′03.1″		1153	–	–	0.006	–	3.32723e+09	Wu et al. (2013)
Gaofengchang	30°42′31.9″	108°19′03.1″		1153	–	–	0.015	–	1.64021e+09	Ni et al. (2014)
Qilixia	31°12′13.8″	107°43′34.2″		1118	–	–	0.009	–	3.1746e+09	Ni et al. (2014)
Qilixia	31°12′13.8″	107°43′34.2″		1118	–	–	0.017	–	2.39173e+09	Ni et al. (2014)
Qilixia	31°12′13.8″	107°43′34.2″		1118	–	–	0.024	–	1.90476e+09	Ni et al. (2014)
Leiyinpu	31°10′04.0″	107°32′20.5″		1104	–	–	0.017	–	1.96788e+08	Ni et al. (2014)
Bandong	30°21′10.9″	106°57′04.5″		1020	–	–	0.011	–	8.67769e+09	Wu et al. (2013)
Bandong	30°21′10.9″	106°57′04.5″		1020	–	–	0.01	–	3.63095e+09	Wu et al. (2013)
Bandong	30°21′10.9″	106°57′04.5″		1020	–	–	0.018	–	1.16071e+09	Wu et al. (2013)
Tieshanpo	31°38′31.4″	107°51′10.6″		1145	–	–	0.034	–	6.30252e+08	Wu et al. (2013)
Zhangjiachang	30°47′17.7″	108°15′22.3″		1156	–	–	0.009	–	6.03865e+09	Wu et al. (2013)
Zhangjiachang	30°47′17.7″	108°15′22.3″		1156	–	–	0.007	–	2.26757e+08	Wu et al. (2013)
Zhangjiachang	30°47′17.7″	108°15′22.3″		1156	–	–	0.007	–	1.2381e+10	Wu et al. (2013)
Dachigan	30°12′03.0″	107°30′01.4″		1167	–	–	0.008	–	4.34253e+09	Wu et al. (2013)
Dachigan	30°12′03.0″	107°30′01.4″		1167	–	–	0.008	–	9.3006e+08	Wu et al. (2013)
Dachigan	30°12′03.0″	107°30′01.4″		1167	–	–	0.002	–	4.15282e+08	Wu et al. (2013)
Xiangguosi	29°56′52.1″	106°38′21.6″		980	–	–	0.011	–	1.4881e+08	Wu et al. (2013)
Xiangguosi	29°56′52.1″	106°38′21.6″		980	–	–	0.016	–	1.46684e+08	Wu et al. (2013)
Xiangguosi	29°56′52.1″	106°38′21.6″		980	–	–	0.014	–	3.03365e+08	Wu et al. (2013)
Xiangguosi	29°56′52.1″	106°38′21.6″		980	–	–	0.014	–	1.5006e+08	Wu et al. (2013)
Huangcaoxia	29°45′35.0″	107°06′13.0″		1019	–	–	0.011	–	2.886e+07	Wu et al. (2013)
Huangcaoxia	29°45′35.0″	107°06′13.0″		1019	–	–	0.01	–	3.03951e+07	Ni et al. (2014)
Anyue	30°05′47.3″	105°20′11.3″		860	–	–	0.014	–	5.10204e+08	Ni et al. (2014)
Anyue	30°05′47.3″	105°20′11.3″		860	–	–	0.015	–	5.01253e+08	Ni et al. (2014)
Anyue	30°05′47.3″	105°20′11.3″		860	–	–	0.014	–	4.97122e+08	Ni et al. (2014)
Anyue	30°05′47.3″	105°20′11.3″		860	–	–	0.012	–	2.72817e+09	Ni et al. (2014)
Anyue	30°05′47.3″	105°20′11.3″		860	–	–	0.011	–	1.36364e+09	Ni et al. (2014)
Bajiaochang	31°10′51.5″	105°37′02.9″		936	–	–	0.017	–	–	Ni et al. (2014)
Bajiaochang	31°10′51.5″	105°37′02.9″		936	–	–	0.017	–	–	Ni et al. (2014)
Bajiaochang	31°10′51.5″	105°37′02.9″		936	–	–	0.016	–	–	Ni et al. (2014)
Bajiaochang	31°10′51.5″	105°37′02.9″		936	–	–	0.016	–	–	Ni et al. (2014)
Hechuan	29°59′10.8″	106°16′28.4″		946	–	–	0.013	–	1.01687e+09	Ni et al. (2014)
Hechuan	29°59′10.8″	106°16′28.4″		946	–	–	0.013	–	3.72208e+08	Ni et al. (2014)
Hechuan	29°59′10.8″	106°16′28.4″		946	–	–	0.012	–	2.57555e+08	Ni et al. (2014)
Hewanchang	32°24′19.6″	105°45′03.4″		1012	–	–	0.012	–	3.52734e+08	Dai et al. (2008)
Hewanchang	32°24′19.6″	105°45′03.4″		1012	–	–	0.011	–	1.66667e+10	Dai et al. (2008)
Zhongba	31°45′46.8″	104°43′33.4″		891	–	–	0.009	–	5.82176e+08	Dai et al. (2008)
Zhongba	31°45′46.8″	104°43′33.4″		891	–	–	0.018	–	5.30612e+10	Dai et al. (2008)
Zhongba	31°45′46.8″	104°43′33.4″		891	–	–	0.014	–	1.33929e+09	Ni et al. (2014)
Zhongba	31°45′46.8″	104°43′33.4″		891	–	–	0.034	–	–	Ni et al. (2014)
Pingluoba	30°14′40.0″	103°25′16.8″		700	–	–	0.049	–	–	Ni et al. (2014)
Xinchang	31°14′48.9″	104°21′12.2″		833	–	–	0.02	–	5.29101e+07	Fan (1999)
Xinchang	31°14′48.9″	104°21′12.2″		833	–	–	0.01	–	1.78571e+08	Fan (1999)
Xinchang	31°14′48.9″	104°21′12.2″		833	–	–	0.01	–	2.14286e+08	Fan (1999)
Xinchang	31°14′48.9″	104°21′12.2″		833	–	–	0.02	–	–	Fan (1999)
Xinchang	31°14′48.9″	104°21′12.2″		833	–	–	0.02	–	8.92857e+06	Fan (1999)
Xiaoquan	31°15′29.0″	104°15′39.2″		826	–	–	0.05	–	6.25e+09	Fan (1999)
Hexingchang	31°14′40.0″	104°30′49.2″		847	–	–	0.01	–	–	Fan (1999)
Luodai	30°37′59.4″	104°18′09.6″		800	–	–	0.012	–	–	Ni et al. (2014)
Luodai	30°37′59.4″	104°18′09.6″		800	–	–	0.013	–	2.27385e+09	Ni et al. (2014)
Qiongxi	30°21′51.7″	103°26′04.4″		709	–	–	0.017	–	3.84425e+09	Ni et al. (2014)
Qiongxi	30°21′51.7″	103°26′04.4″		709	–	–	0.018	–	3.86029e+09	Ni et al. (2014)
Qiongxi	30°21′51.7″	103°26′04.4″		709	–	–	0.017	–	4.34174e+09	Ni et al. (2014)
Qiongxi	30°21′51.7″	103°26′04.4″		709	–	–	0.017	–	–	Ni et al. (2014)
Ziliujing	29°21′22.1″	104°45′47.7″		788	–	–	0.021	–	–	Ni et al. (2014)
Washi	29°18′05.6″	104°57′32.2″		805	–	–	0.022	–	3.1585e+08	Ni et al. (2014)
Weiyuan	29°30′44.3″	104°39′04.6″		782	–	–	0.041	–	–	Ni et al. (2014)
Weiyuan	29°30′44.3″	104°39′04.6″		782	–	–	0.024	–	8.40747e+08	Ni et al. (2014)
Weiyuan	29°30′44.3″	104°39′04.6″		782	–	–	0.013	–	6.61225e+08	Ni et al. (2014)
Weiyuan	29°30′44.3″	104°39′04.6″		782	–	–	0.021	–	–	Ni et al. (2014)
Weiyuan	29°30′44.3″	104°39′04.6″		782	–	–	0.022	–	–	Ni et al. (2014)
1Distance to the IACB (India-Asia convergence boundary) in the Myanmar or near the EHS (eastern Himalayan syntaxis) is measured using Google Earth software (www.earth.google.com).
2RM/RA notation where RM = sample 3He/4He ratio and RA = atmosphere 3He/4He ratio (= 1.4 × 10-6).
3X = (4He/20Ne)M/(4He/20Ne)air × βNe/βHe, where M is the measured 4He/20Ne ratio, β represents the Bunsen solubility coefficient assuming a recharge temperature of 15°C (Weiss, 1971).
4RC/RA is the air-corrected He isotope ratio = [(RM/RA × X) − 1]/(X − 1), following methods described in Ozima and Podosek (1983), and Hilton (1996).
5p.c. = personal communication
References
Bo, Y., Liu, C., Zhao, Y. and Wang, L., 2015, Chemical and isotopic characteristics and origin of spring waters in the Lanping–Simao Basin, Yunnan, Southwestern China. Chemie der Erde, 75: 287–300.
Cheng, Z., Guo, Z., Zhang, M. and Zhang, L., 2014, Carbon dioxide emissions from Tengchong Cenozoic volcanic field, Yunnan Province, SW China. Acta Petrologica Sinica, 30: 3657–3670 (in Chinese with English abstract).
Dai, J., Dai, C., Song, Y. and Liao, Y., 1994, Geochemical characteristics of natural gases in selected hot springs in China and their carbon, helium isotope compositions. Science in China (Series B), 24: 426–433 (in Chinese).
Dai, J., Yang, S., Chen, H. and Shen, X., 2005, Geochemistry and occurrence of inorganic gas accumulations in Chinese sedimentary basins. Organic Geochemistry, 36: 1664–1688.
Dai, J., Zou, C., Zhang, S., Li, J., Ni, Y., Hu, G., Luo, X., Tao, S., Zhu, G., Mi, J., Li, Z., Hu, A., Yang, C., Zhou, Q., Shuai, Y., Zhang, Y. and Ma, C., 2008, Discrimination of abiogenic and biogenic alkane gases. Science in China Series D: Earth Sciences, 51: 1737–1749.
Du, J., Cheng, W., Zhang, Y., Jie, C., Guan, Z., Liu, W. and Bai, L., 2006, Helium and carbon isotopic compositions of thermal springs in the earthquake zone of Sichuan, Southwestern China. Journal of Asian Earth Sciences, 26: 533–539.
Du, J., Liu, C., Fu, B., Ninomiya, Y., Zhang, Y., Wang, C., Wang, H. and Sun, Z., 2005, Variations of geothermometry and chemical-isotopic compositions of hot spring fluids in the Rehai geothermal field, southwestern China. Journal of Volcanology and Geothermal Research, 142: 243–261.
Fan, R., 1999, Carbon isotopic evidence for the gas formation and migration in the western Sichuan. Progress in Natural Science, 9: 1126–1132 (in Chinese).
Gao, B. and Zhang, H., 2001, Geochemical characteristics of emission gases from Penzhu pond in Yunnan. Bulletin of Mineralogy, Petrology and Geochemistry, 20: 49–51 (in Chinese with English abstract).
Halldórsson, S. A., Hilton, D. R., Troll, V. R. and Fischer, T. P., 2013, Resolving volatile sources along the western Sunda arc, Indonesia. Chemical Geology, 339: 263–282.
Hilton, D.R., 1996. The helium and carbon isotope systematics of a continental geothermal system: results from monitoring studies at Long Valley caldera (California, U.S.A.). Chemical Geology, 127: 269–295.
Li, Q., Wang, Y., Zhou, Y. and Zhao, C., 2018, Geochemical characteristics of hot spring gases from the Deqin-Zhongdian area, northwestern Yunnan, China. Bulletin of Mineralogy, Petrology and Geochemistry, 37: 645–651 (in Chinese with English abstract).
Ni, Y., Dai, J., Tao, S., Wu, X., Liao, F., Wu, W. and Zhang, D., 2014, Helium signatures of gases from the Sichuan Basin, China. Organic Geochemistry, 74: 33–43.
Ozima, M. and Podosek, F.A., 1983. Noble gas geochemistry. Cambridge University Press, Cambridge.
Shangguan, Z., 1999, Variations of chemical compositions of mantle-derived magmatic gases and the origins during their ascent towards the surface in the Tengchong volcanic area. Geological Review, 45: 926–933 (in Chinese with English abstract).
Shangguan, Z., Bai, C. and Sun, M., 2000, Mantle-derived magmatic gas releasing features at the Rehai area, Tengchong County, Yunnan Province, China. Science in China (Series D), 43: 132–140.
Shangguan, Z., Gao, Q. and Zhao, C., 2004, Geochemical evidence of the activity of the NW-trending fault at Rehai area, Tengchong, Yunnan Province, China. Seismology and Geology, 26: 46–51 (in Chinese with English abstract).
Shangguan, Z., Zhao, C., Li, H., Gao, Q. and Sun, M., 2005, Evolution of hydrothermal explosions at Rehai geothermal field, Tengchong volcanic region, China. Geothermics, 34: 518–526.
Shen, L., Yuan, D., Ding, T., Li, Y., Le, G. and Lin, Y., 2007, Distributing in homogeneity of helium isotope of CO2 degasification point and its geotecogenesis in Southwest of China. Acta Geologica Sinica, 81: 475–489 (in Chinese with English abstract).
Tang, X., Zhang, J., Pang, Z., Hu, S., Tian, J. and Bao, S., 2017, The eastern Tibetan Plateau geothermal belt, western China: Geology, geophysics, genesis, and hydrothermal system. Tectonophysics, 717: 433–448.
Tian, J., Pang, Z., Guo, Q., Wang, Y., Li, J., Huang, T. and Kong, Y., 2018, Geochemistry of geothermal fluids with implications on the sources of water and heat recharge to the Rekeng high-temperature geothermal system in the Eastern Himalayan Syntax. Geothermics, 74: 92–105.
Wang, X., Chen, J., Li, Y., Wen, Q., Sun, M., Li, C., Hu, G., 1994. Volcanic activity revealed by isotope systematics of gases from hydrothermal springs in Tengchong, China, in: Matsuda, J. (Ed.), Noble Gas Geochemistry and Cosmochemistry, pp. 293–304.
Wang, Y., Li, Q., Ran, H., Zhao, C. and Liu, Y., 2018, Geothermal and seismic activities in the southeastern Tibetan Plateau: Constraints from helium isotopes. Bulletin of Mineralogy, Petrology and Geochemistry, 37: 652–662 (in Chinese with English abstract).
Wang, Y., Liu, Y., Zhao, C., Li, Q., Zhou, Y., Ran, H., 2020. Helium and carbon isotopic signatures of thermal spring gases in southeast Yunnan, China. Journal of Volcanology and Geothermal Research 402, 106995.
Weiss, R.F., 1971. Solubility of helium and neon in water and seawater. Journal of Chemical and Engineering Data, 16: 235–241.
Wu, X., Dai, J., Liao, F. and Huang, S., 2013, Origin and source of CO2 in natural gas from the eastern Sichuan Basin. Science China Earth Sciences, 56: 1308–1317.
Xiao, C., Wang, Q., Li, G., Zhou, X. and Zhao, Y., 2017, Subduction-related hot spring-type gold mineralization in the central Tengchong block, southwestern China. Ore Geology Reviews, 90: 987–997.
Xu, S., Nakai, S. i., Wakita, H. and Wang, X., 2004, Carbon and noble gas isotopes in the Tengchong volcanic geothermal area, Yunnan, southwestern China. Acta Geologica Sinica, 78: 1122–1135.
Zhang, M., Guo, Z., Sano, Y., Zhang, L., Sun, Y., Cheng, Z. and Yang, T.F., 2016. Magma-derived CO2 emissions in the Tengchong volcanic field, SE Tibet: Implications for deep carbon cycle at intra-continent subduction zone. Journal of Asian Earth Sciences, 127: 76–90.
Zhao, C., 2008, Mantle-derive helium release characteristics and deep magma chamber activities of present day in the Tengchong volcanic area: Doctoral thesis, Institute of Geology, China Earthquake Administration, p. 1–125 (in Chinese with English abstract).
Zhou, X., Liu, L., Chen, Z., Cui, Y. and Du, J., 2017, Gas geochemistry of the hot spring in the Litang fault zone, southeast Tibetan Plateau. Applied Geochemistry, 79: 17–26.
Zhou, X., Wang, W., Chen, Z., Yi, L., Liu, L., Xie, C., Cui, Y., Du, J., Cheng, J. and Yang, L., 2015, Hot Spring Gas Geochemistry in Western Sichuan Province, China After the Wenchuan Ms 8.0 Earthquake. Terrestrial, Atmospheric & Oceanic Sciences, 26: 361–373.
Zhou, X., Wang, W., Li, L., Hou, J., Xing, L., Li, Z., Shi, H. Yan, Y., 2020. Geochemical features of hot spring gases in the Jinshajiang-Red River fault zone, Southeast Tibetan Plateau. Acta Petrol. Sin. 36, 2197–2214 (in Chinese with English abstract).
